# Supplementary material for: Ultrafast spray pyrolysis fabrication of a nanophase ZnMn2O4anode towards high-performance Li-ion batteries
Source: Royal Society of Chemistry journal article supplement (doi:10.1039/c4ra15898a), 2015-01-01
Supplement: c4ra15898a1.pdf [file c4ra15898a1.pdf]

## Supporting Information

### **Ultrafast spray pyrolysis fabrication of nanophase ZnMn<sub>2</sub>O<sub>4</sub> anode towards high-performance Li-ion batteries**

*Longhai Zhang,<sup>a</sup> Siqu Zhu,<sup>a</sup> Hui Cao,<sup>a</sup> Gang Pang,<sup>a</sup> Jingdong Lin,<sup>\* b</sup> Linrui Hou<sup>\* a</sup> and Changzhou Yuan,<sup>\* a, c</sup>*

*<sup>a</sup> School of Materials Science and Engineering, Anhui University of Technology, Ma'anshan, 243002, P. R. China      Email: [ayuan cz@163.com](mailto:ayuan cz@163.com) (C.Z. Yuan); [houlr629@163.com](mailto:houlr629@163.com) (L.R. Hou)*

*<sup>b</sup> Department of Chemistry, College of Chemistry and Chemical Engineering, Xiamen University, Xiamen, 361005, P. R. China      Email: [jdlin@xmu.edu.cn](mailto:jdlin@xmu.edu.cn) (J.D. Lin)*

*<sup>c</sup> Chinese Academy of Science (CAS) Key Laboratory of Materials for Energy Conversion, Hefei, 230026, P.R. China*

**Table S1** Atomic coordinates, isotropic thermal parameters and occupation numbers for the ZMO phase refined from X-ray powder diffraction data. Spinel-type structure in space group  $I4_1/amd$  (No. 141); cell parameters:  $a = 5.7399$  (6) Å,  $c = 9.2903$  (1) Å,  $V = 306.08$  (8) Å<sup>3</sup> and  $Z = 4$ ;  $R_{wp} = 9.16$  %,  $R_p = 7.31$  %,  $S = 1.91$ .

| Atom | Site | g        | x   | y        |
|------|------|----------|-----|----------|
| Mn   | 4a   | 0.839(9) | 0.0 | 0.0      |
| Zn   | 16h  | 0.849(1) | 0.0 | 0.244(2) |
| O    | 16h  | 1.253(1) | 0.0 | 0.225(3) |

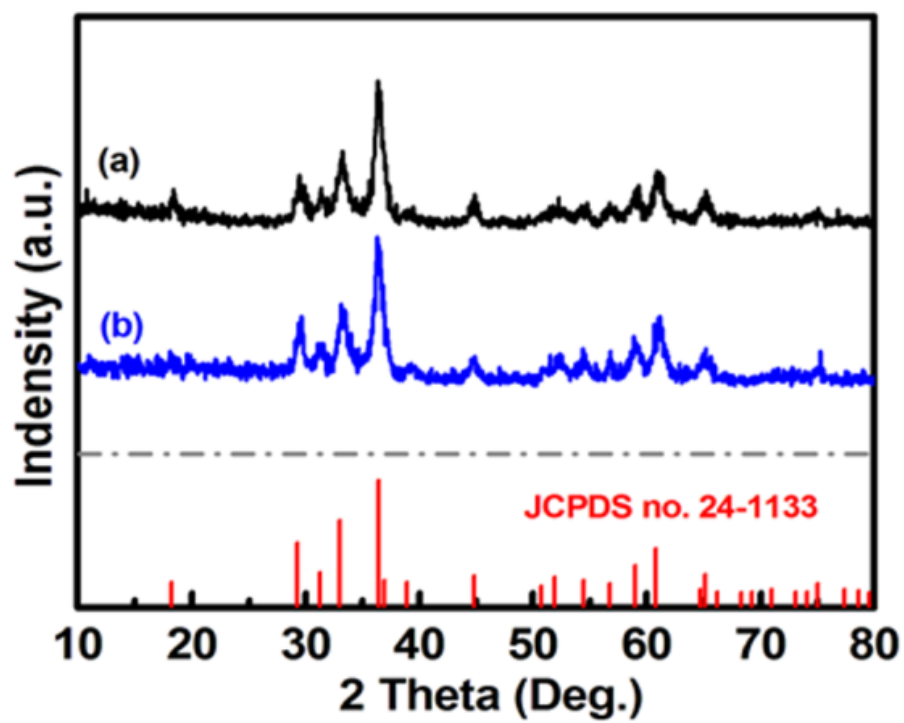

Fig. S1 XRD patterns of the (a) ZMO-AE and (b) ZMO-EG samples

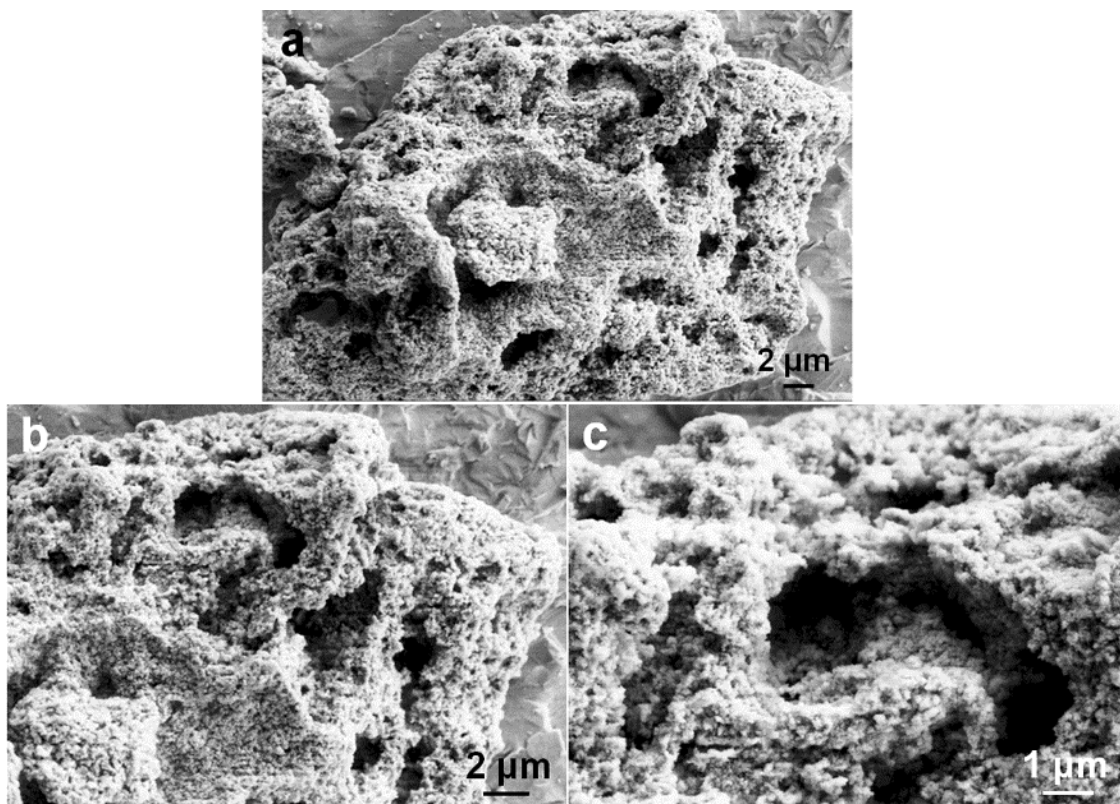

**Fig. S2** Low-magnification FESEM images of the as-obtained ZMO-W sample with different magnifications

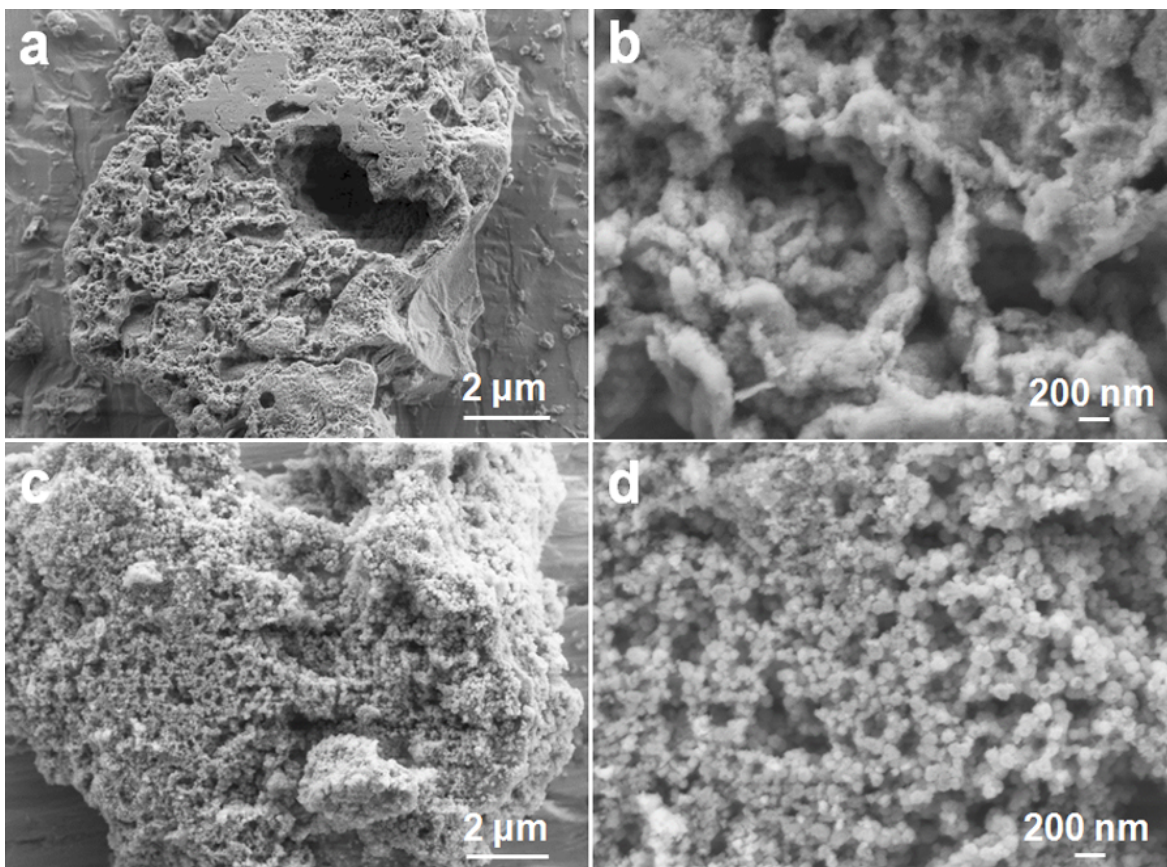

**Fig. S3** FESEM images of the (a, b) ZMO-AE and (c, d) ZMO-EG products

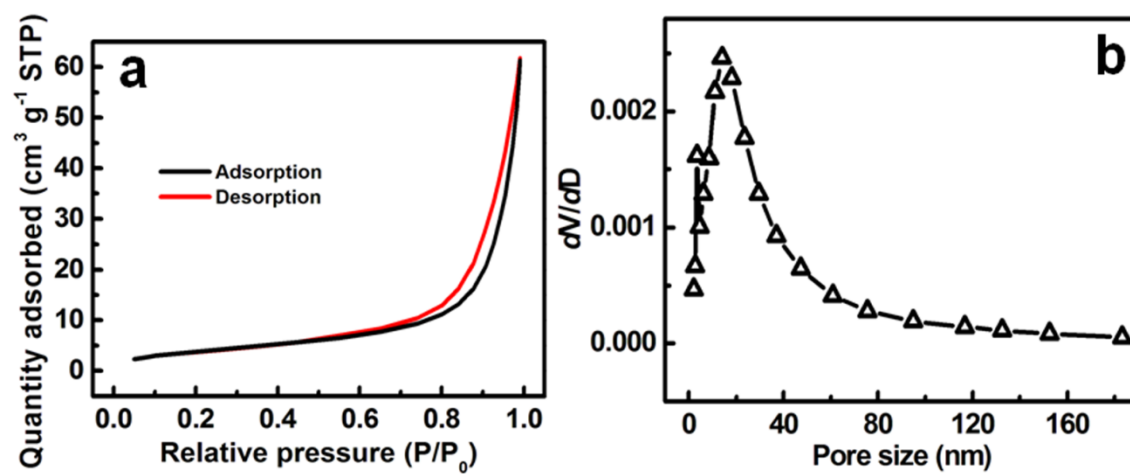

**Fig. S4** (a) N<sub>2</sub> adsorption-desorption isotherms and (b) corresponding PSD data of the ZMO-AE sample

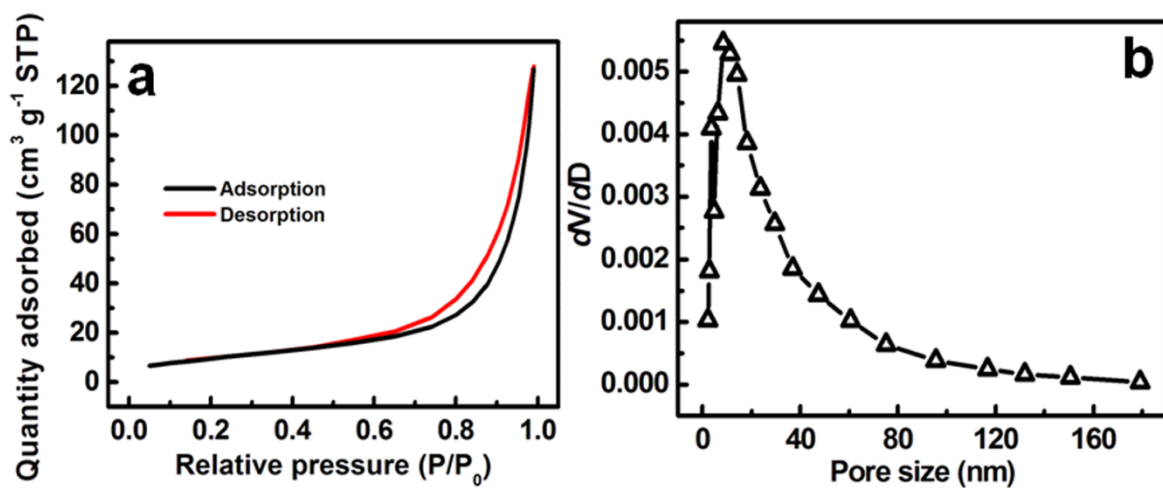

**Fig. S5** (a) N<sub>2</sub> adsorption-desorption isotherms and (b) corresponding PSD data of the ZMO-EG sample

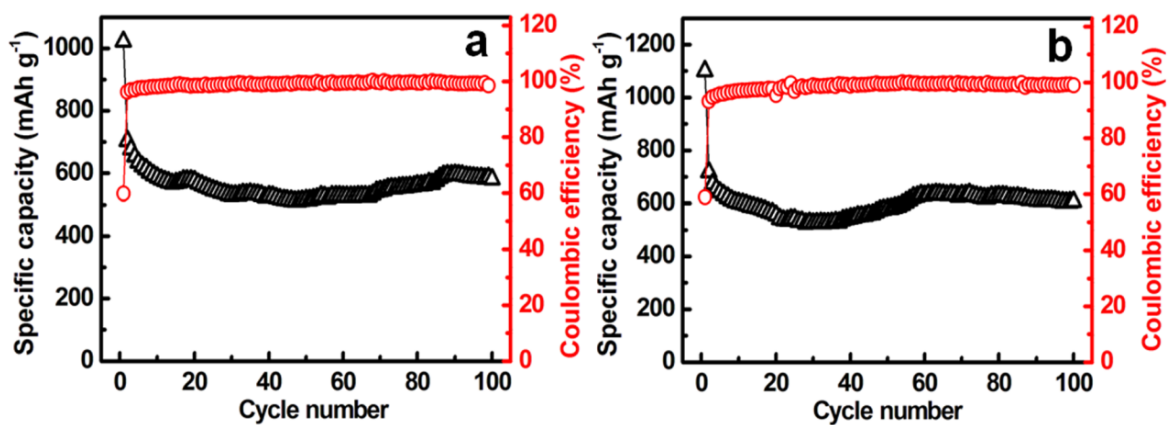

**Fig. S6** Cycling performance (1.0 C) of the (a) ZMO-AE and (b) ZMO-EG products
